# Supplementary material for: Clinical Study of Nanofibrillar Cellulose Hydrogel Dressing for Skin Graft Donor Site Treatment
Source: PubMed Central journal article supplement (PMC7047117; doi:10.1089/wound.2019.0982), 2020-02-07
Supplement: Supp_TableS2.pdf [file Supp_TableS2.pdf]

**Supplementary Table S2. Characteristics of the epithelialized skin during follow-up**

|                            | 1 Month     | 6 Months <sup>a</sup> | p                  |
|----------------------------|-------------|-----------------------|--------------------|
| TEWL (g/m <sup>2</sup> /h) |             |                       |                    |
| NFC (N=19)                 | 28.0 (11.8) | 8.6 (4.7)             | <0.001*            |
| Copolymer (N=14)           | 26.8 (9.7)  | 11.2 (7.4)            | 0.01*              |
| Healthy skin (N=19)        | 6.2 (3.7)   | 8.1 (4.5)             | —                  |
| <i>p</i>                   | <0.001**    | 0.81***               |                    |
| Viscoelasticity (MPa)      |             |                       |                    |
| NFC (N=19)                 | 14.6 (4.2)  | 12.2 (2.3)            | 0.12*              |
| Copolymer (N=14)           | 16.3 (5.3)  | 12.9 (3.1)            | 0.04*              |
| Healthy skin (N=19)        | 10.4 (3.2)  | 11.4 (3.3)            | —                  |
| <i>p</i>                   | 0.50***     | 0.42**                |                    |
| Elastic modulus (MPa)      |             |                       |                    |
| NFC (N=19)                 | 5.7 (1.2)   | 5.1 (0.7)             | 0.12 <sup>†</sup>  |
| Copolymer (N=14)           | 6.2 (1.6)   | 5.1 (0.9)             | 0.047 <sup>†</sup> |
| Healthy skin (N=19)        | 4.6 (0.9)   | 4.8 (1.0)             | —                  |
| <i>p</i>                   | 0.002**     | 0.47**                |                    |

Values are presented as mean (SD).

<sup>a</sup>N=17 for NFC, N=12 for copolymer.

\*Wilcoxon signed-ranks test; 1 month vs. 6 months

\*\*One-way analysis of variance; comparison of the three groups.

\*\*\*Kruskal-Wallis H test; comparison of the three groups.

<sup>†</sup>Paired-samples *t*-test; 1 month vs. 6 months.

TEWL, transepidermal water loss.
